# Supplementary material
Source: MDPI journal article supplement (https://www.mdpi.com/2297-8739/4/4/34)
Supplement: s1 [file s1]

EcInt MW=338?  
ASAP(SOLID)

EPSRC National Facility Swansea  
LTQ Orbitrap XL

Downs  
19/09/2013 15:11:01

NORPER015-PG-HASP #23-27 RT: 1.31-1.54 AV: 5 SM: 7G NL: 1.08E7  
T: FTMS + p APCI corona Full ms [100.00-1200.00]

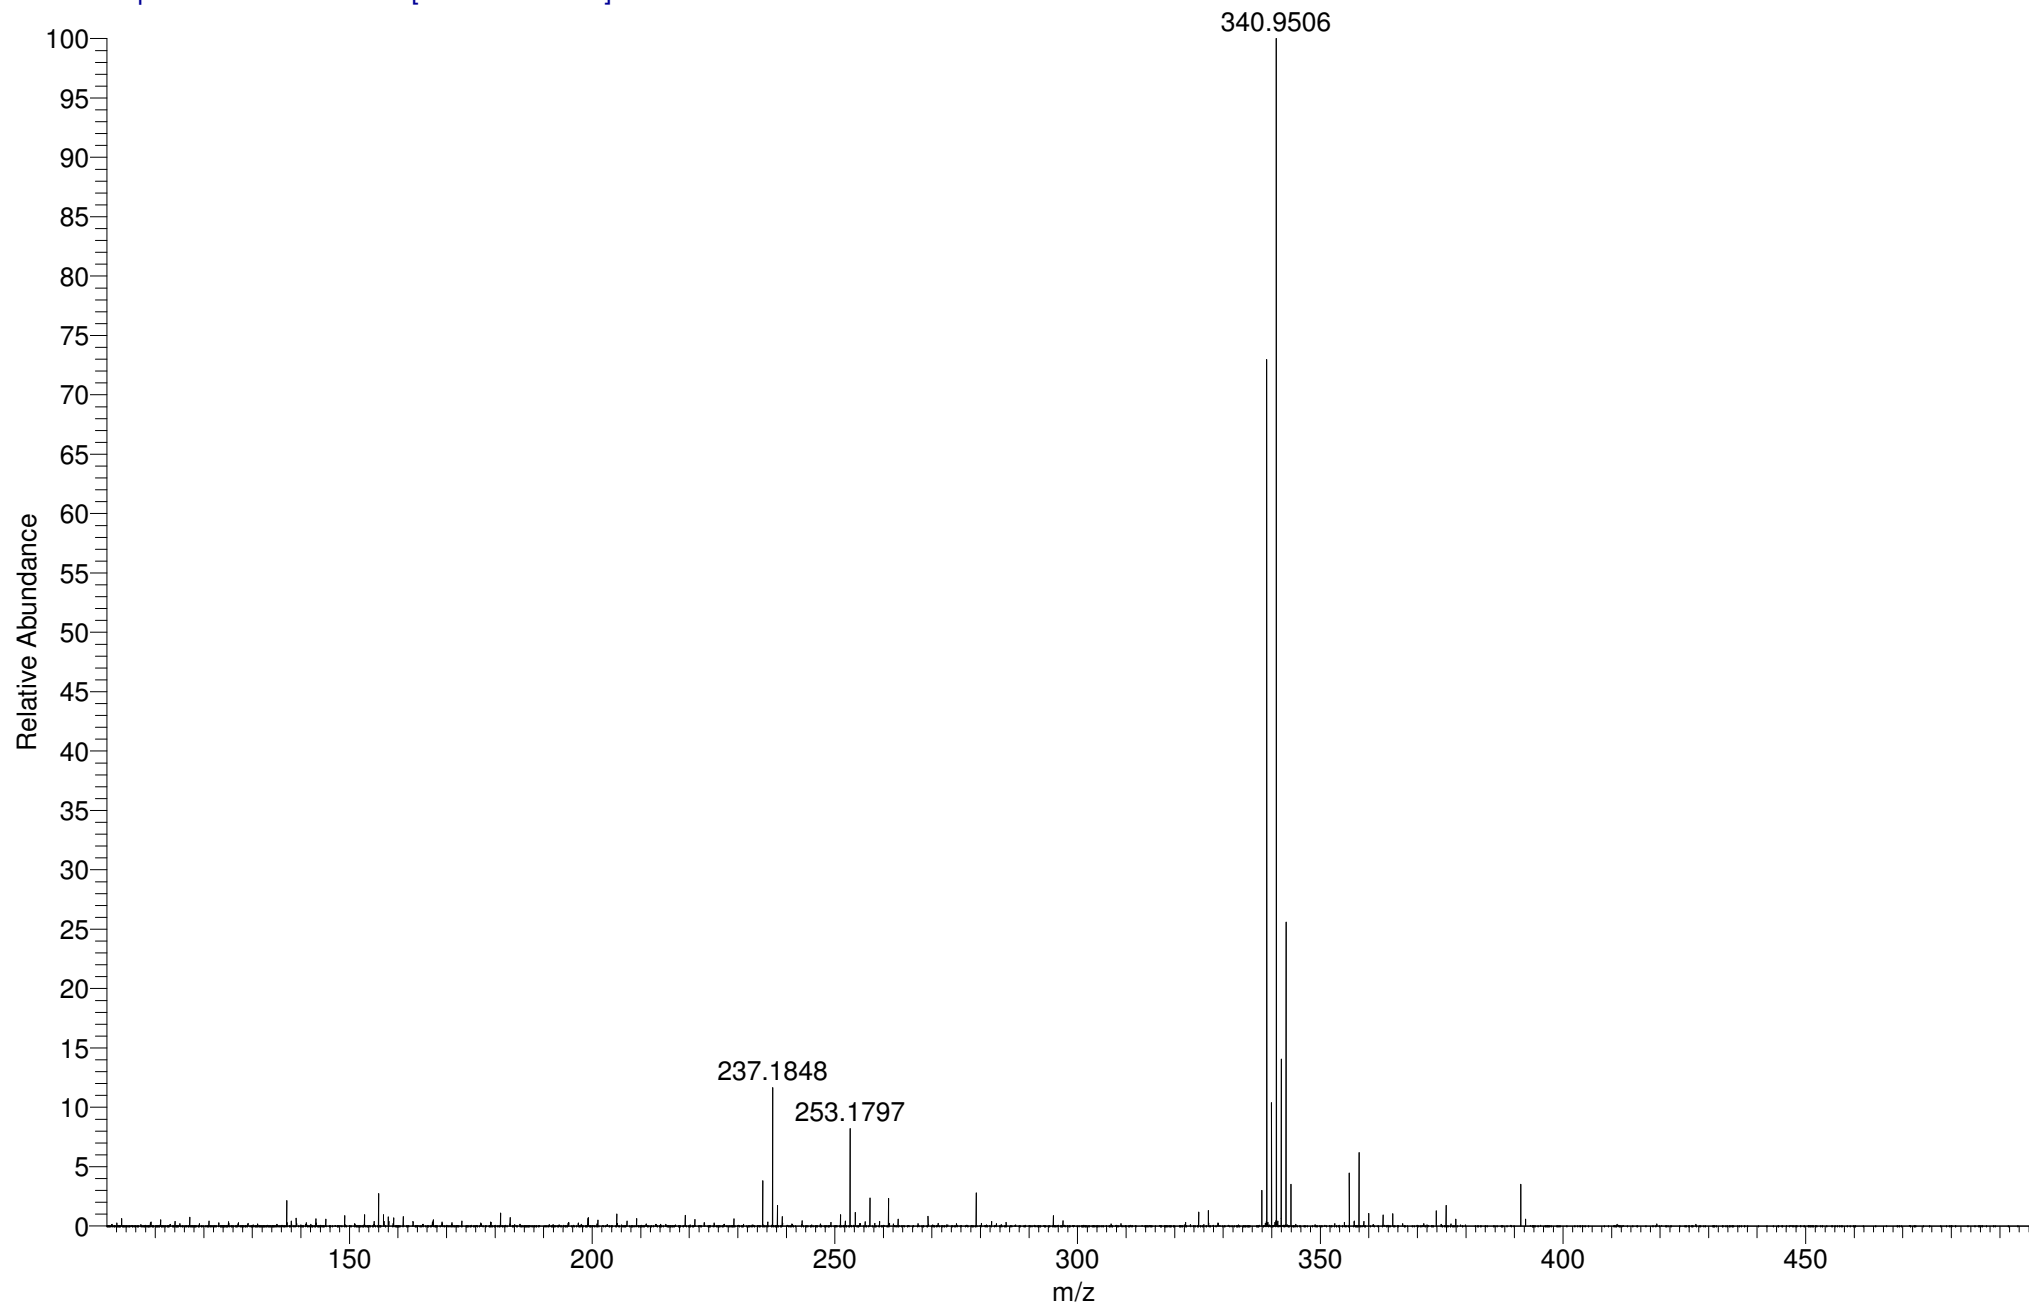

EcInt MW=338?  
ASAP(SOLID)

EPSRC National Facility Swansea  
LTQ Orbitrap XL

Downs  
19/09/2013 15:11:01

NORPER015-PG-HASP #23-27 RT: 1.31-1.54 AV: 5 SM: 7G NL: 1.08E7  
T: FTMS + p APCI corona Full ms [100.00-1200.00]

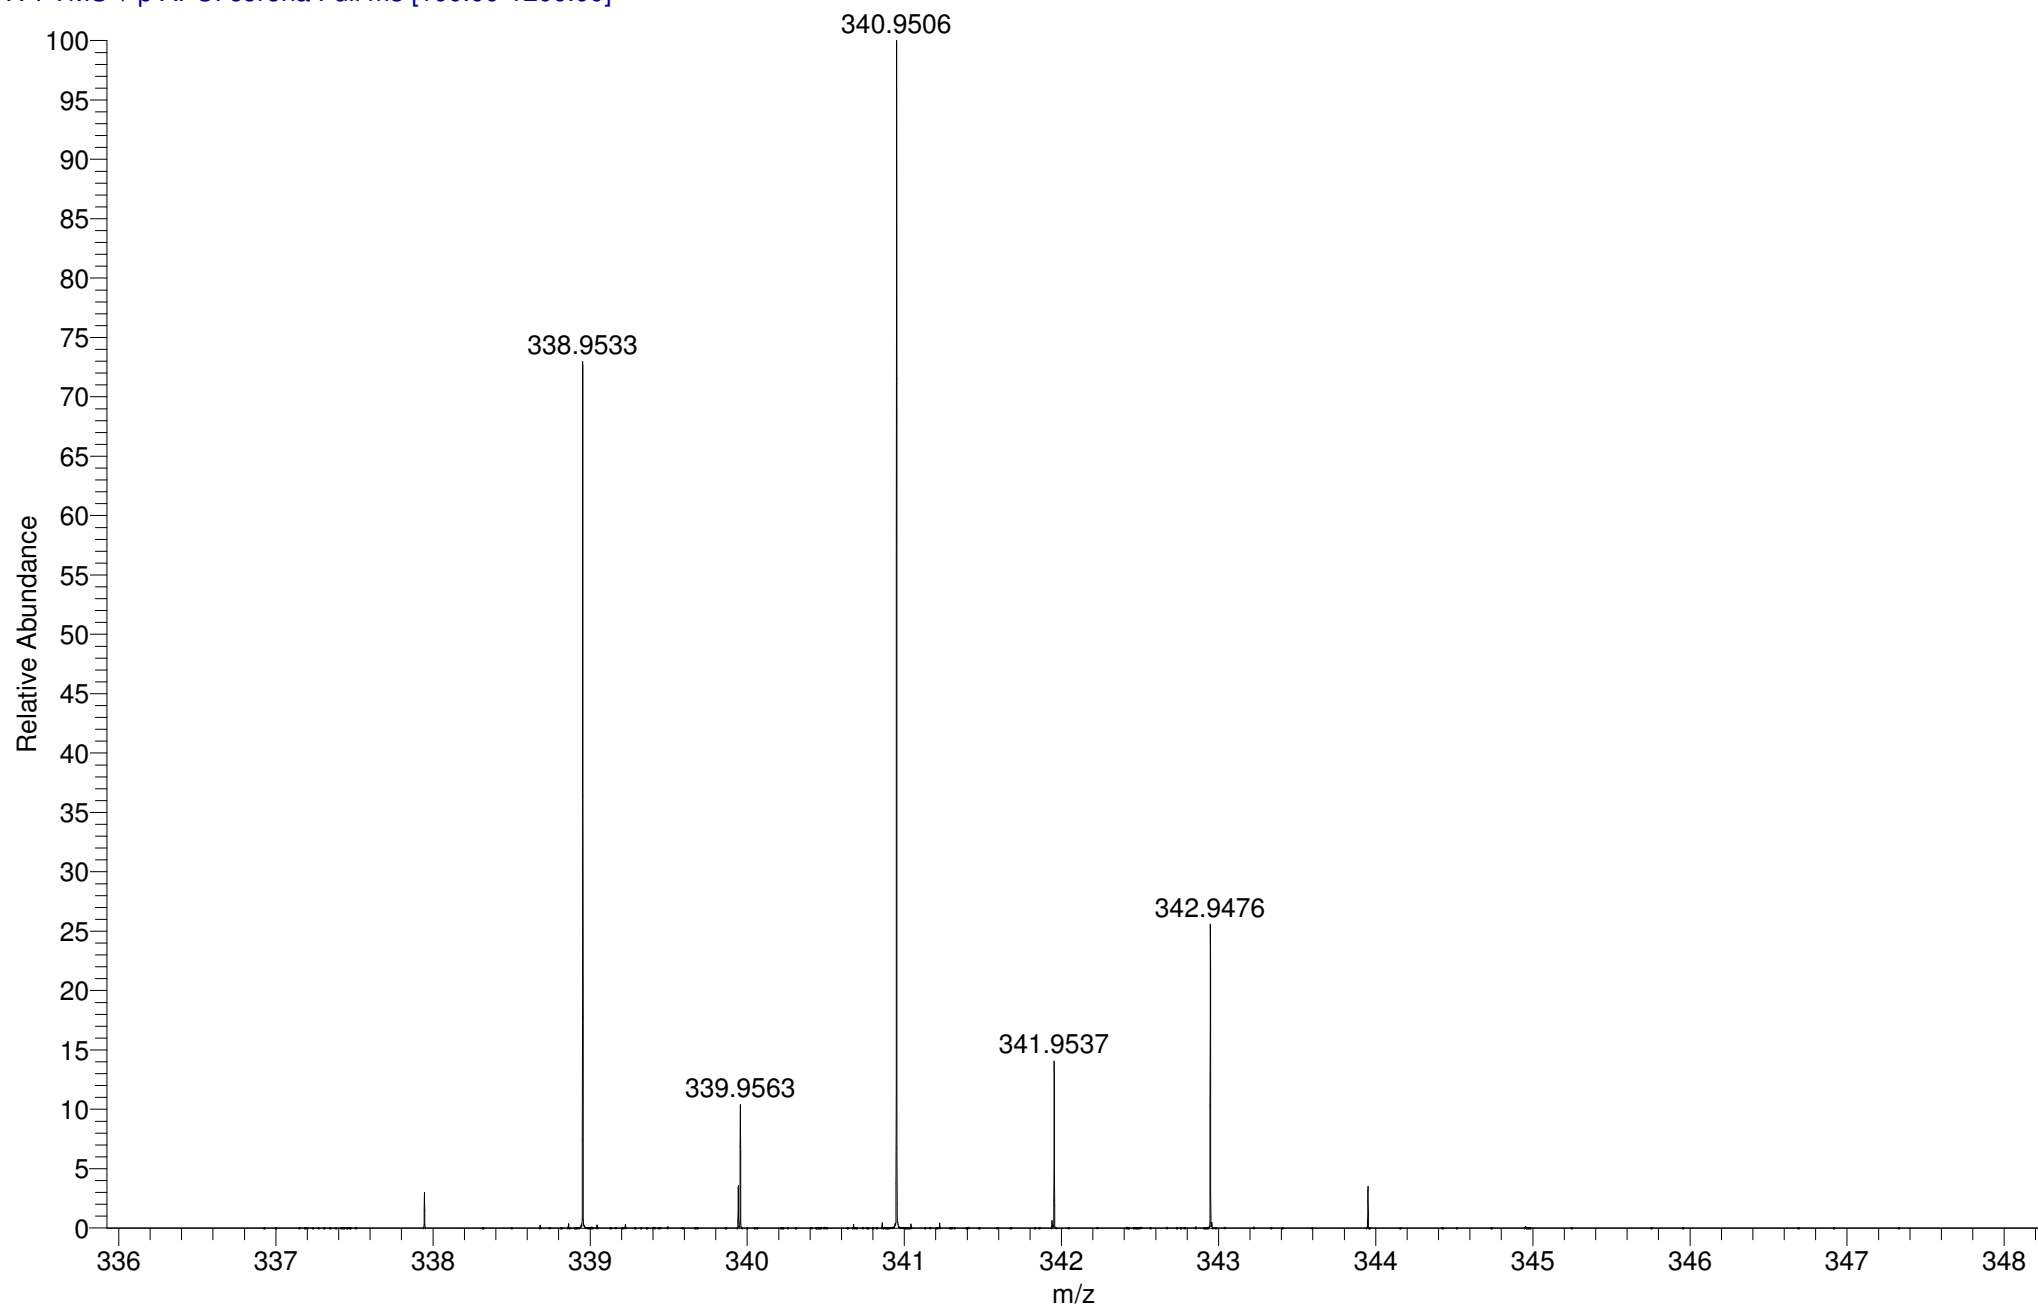

SM: 7G

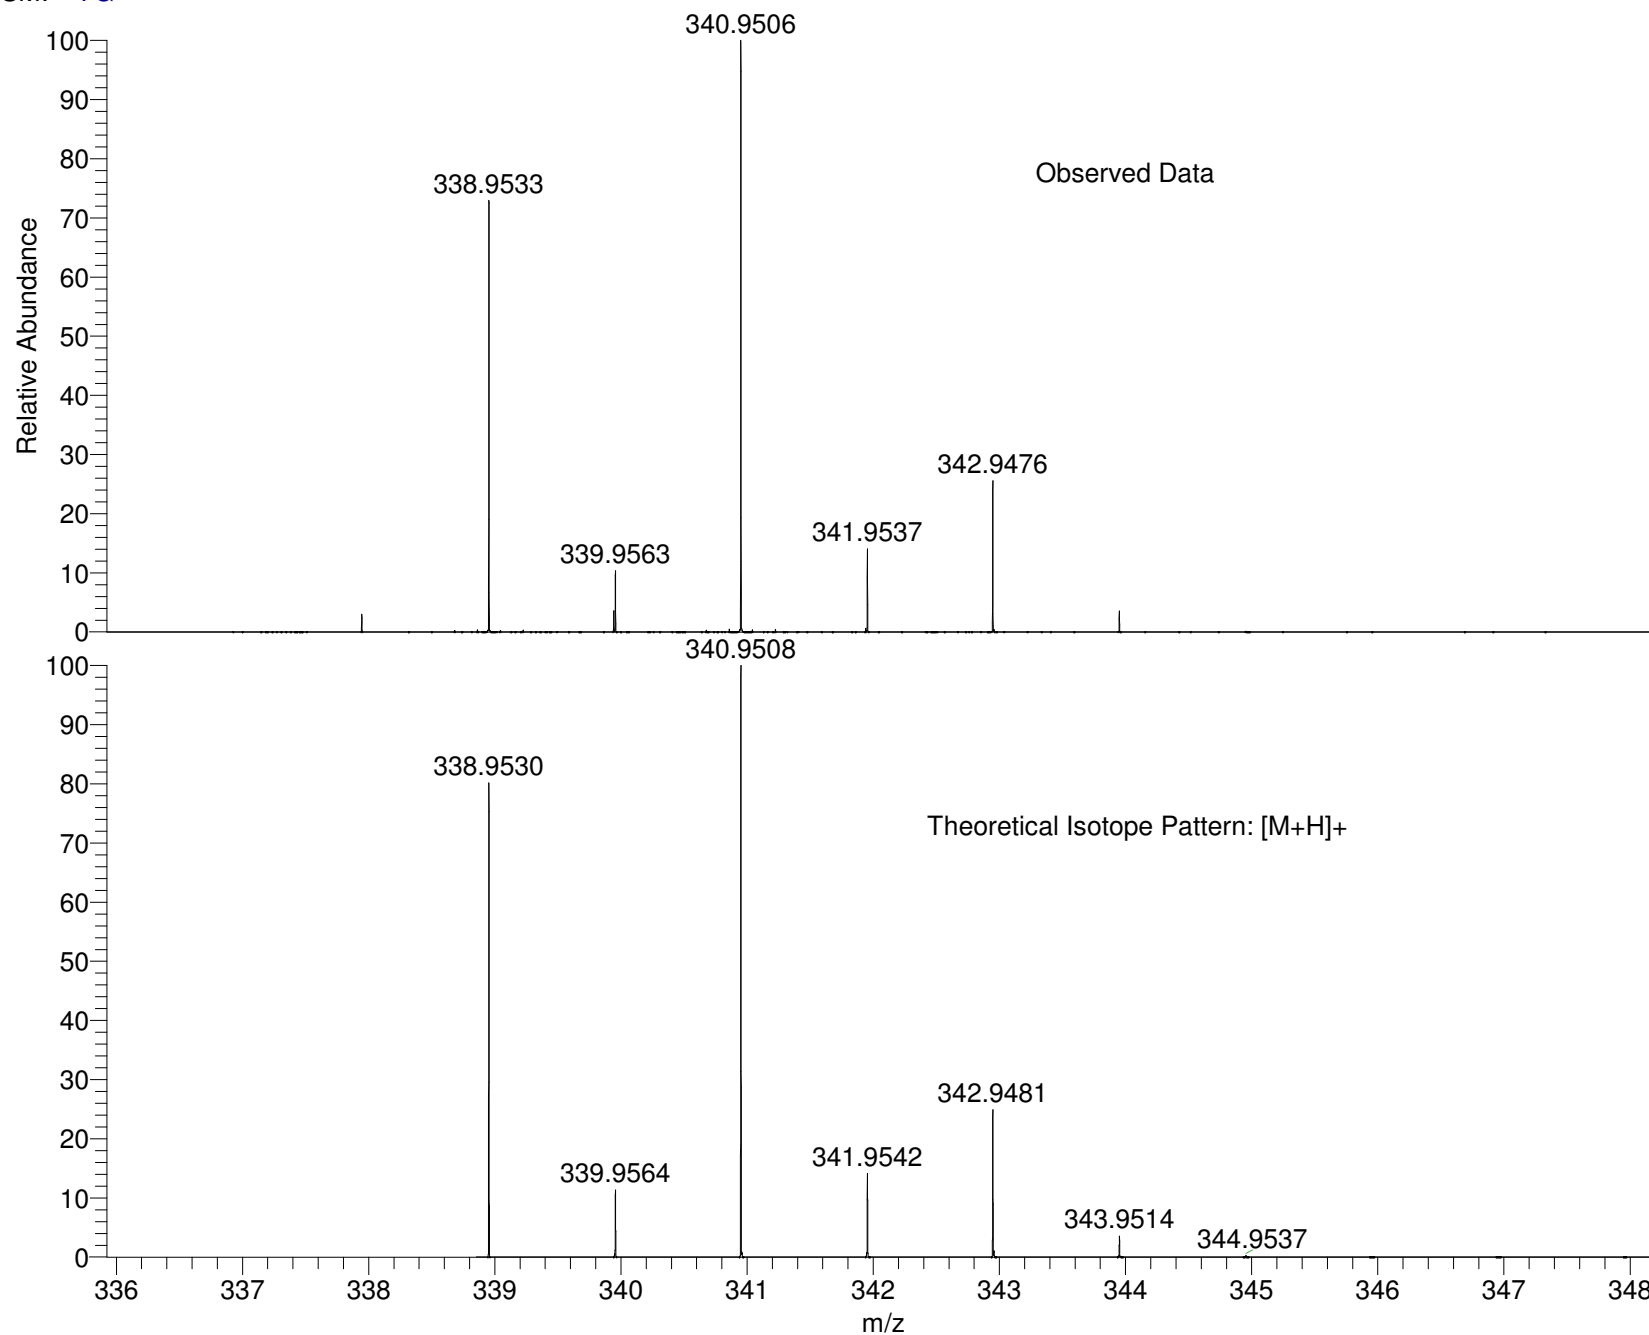

NL:  
1.08E7  
NORPER015-PG-HASP#23-27  
RT: 1.31-1.54 AV: 5 T: FTMS  
+ p APCI corona Full ms  
[100.00-1200.00]

NL:  
9.65E3  
C<sub>13</sub>H<sub>8</sub>BrClN<sub>2</sub>O<sub>2</sub>H:  
C<sub>13</sub>H<sub>9</sub>Br<sub>1</sub>Cl<sub>1</sub>N<sub>2</sub>O<sub>2</sub>  
p (gss, s/p:40) Chrg 1  
R: 100000 Res .Pwr . @FWHM

Isotope:                   Min. .. Max.  
 14 N                   0....10  
 16 O                   0....14  
 12 C                   0....65  
 1 H                   0....80  
 23 Na                  0....0  
 35 Cl                  1....2  
 79 Br                  1....2  
 Tolerance Window:     +- 5.00 ppm  
 Db/Ring Equiv:       -3.. 100  
 Fits:                  150

N-Rule:   Do not use  
 Charge:   1

| Mass     | Theoretical<br>Mass | Delta<br>[ppm] | RDB  | Composition                                                                                   |
|----------|---------------------|----------------|------|-----------------------------------------------------------------------------------------------|
| 338.9533 | 338.9535            | -0.7           | 5.0  | C <sub>10</sub> H <sub>12</sub> O <sub>1</sub> N <sub>3</sub> Br <sub>1</sub> Cl <sub>2</sub> |
|          | 338.9530            | 0.8            | 9.5  | C <sub>13</sub> H <sub>9</sub> O <sub>2</sub> N <sub>2</sub> Br <sub>1</sub> Cl <sub>1</sub>  |
|          | 338.9522            | 3.3            | 5.5  | C <sub>8</sub> H <sub>10</sub> N <sub>6</sub> Br <sub>1</sub> Cl <sub>2</sub>                 |
|          | 338.9549            | -4.6           | 4.5  | C <sub>12</sub> H <sub>14</sub> O <sub>2</sub> Br <sub>1</sub> Cl <sub>2</sub>                |
|          | 338.9517            | 4.7            | 10.0 | C <sub>11</sub> H <sub>7</sub> O <sub>1</sub> N <sub>5</sub> Br <sub>1</sub> Cl <sub>1</sub>  |
