# Supplementary material
Source: MDPI journal article supplement (https://www.mdpi.com/2297-8739/4/4/34)
Supplement: s1 [file s1]

BCCPCA MW=325?  
ASAP(SOLID)

EPSRC National Facility Swansea  
LTQ Orbitrap XL

Downs  
19/09/2013 15:16:33

NORPER016-PG-HASP #31-39 RT: 1.77-2.22 AV: 9 SM: 7G NL: 1.23E7

T: FTMS + p APCI corona Full ms [100.00-800.00]

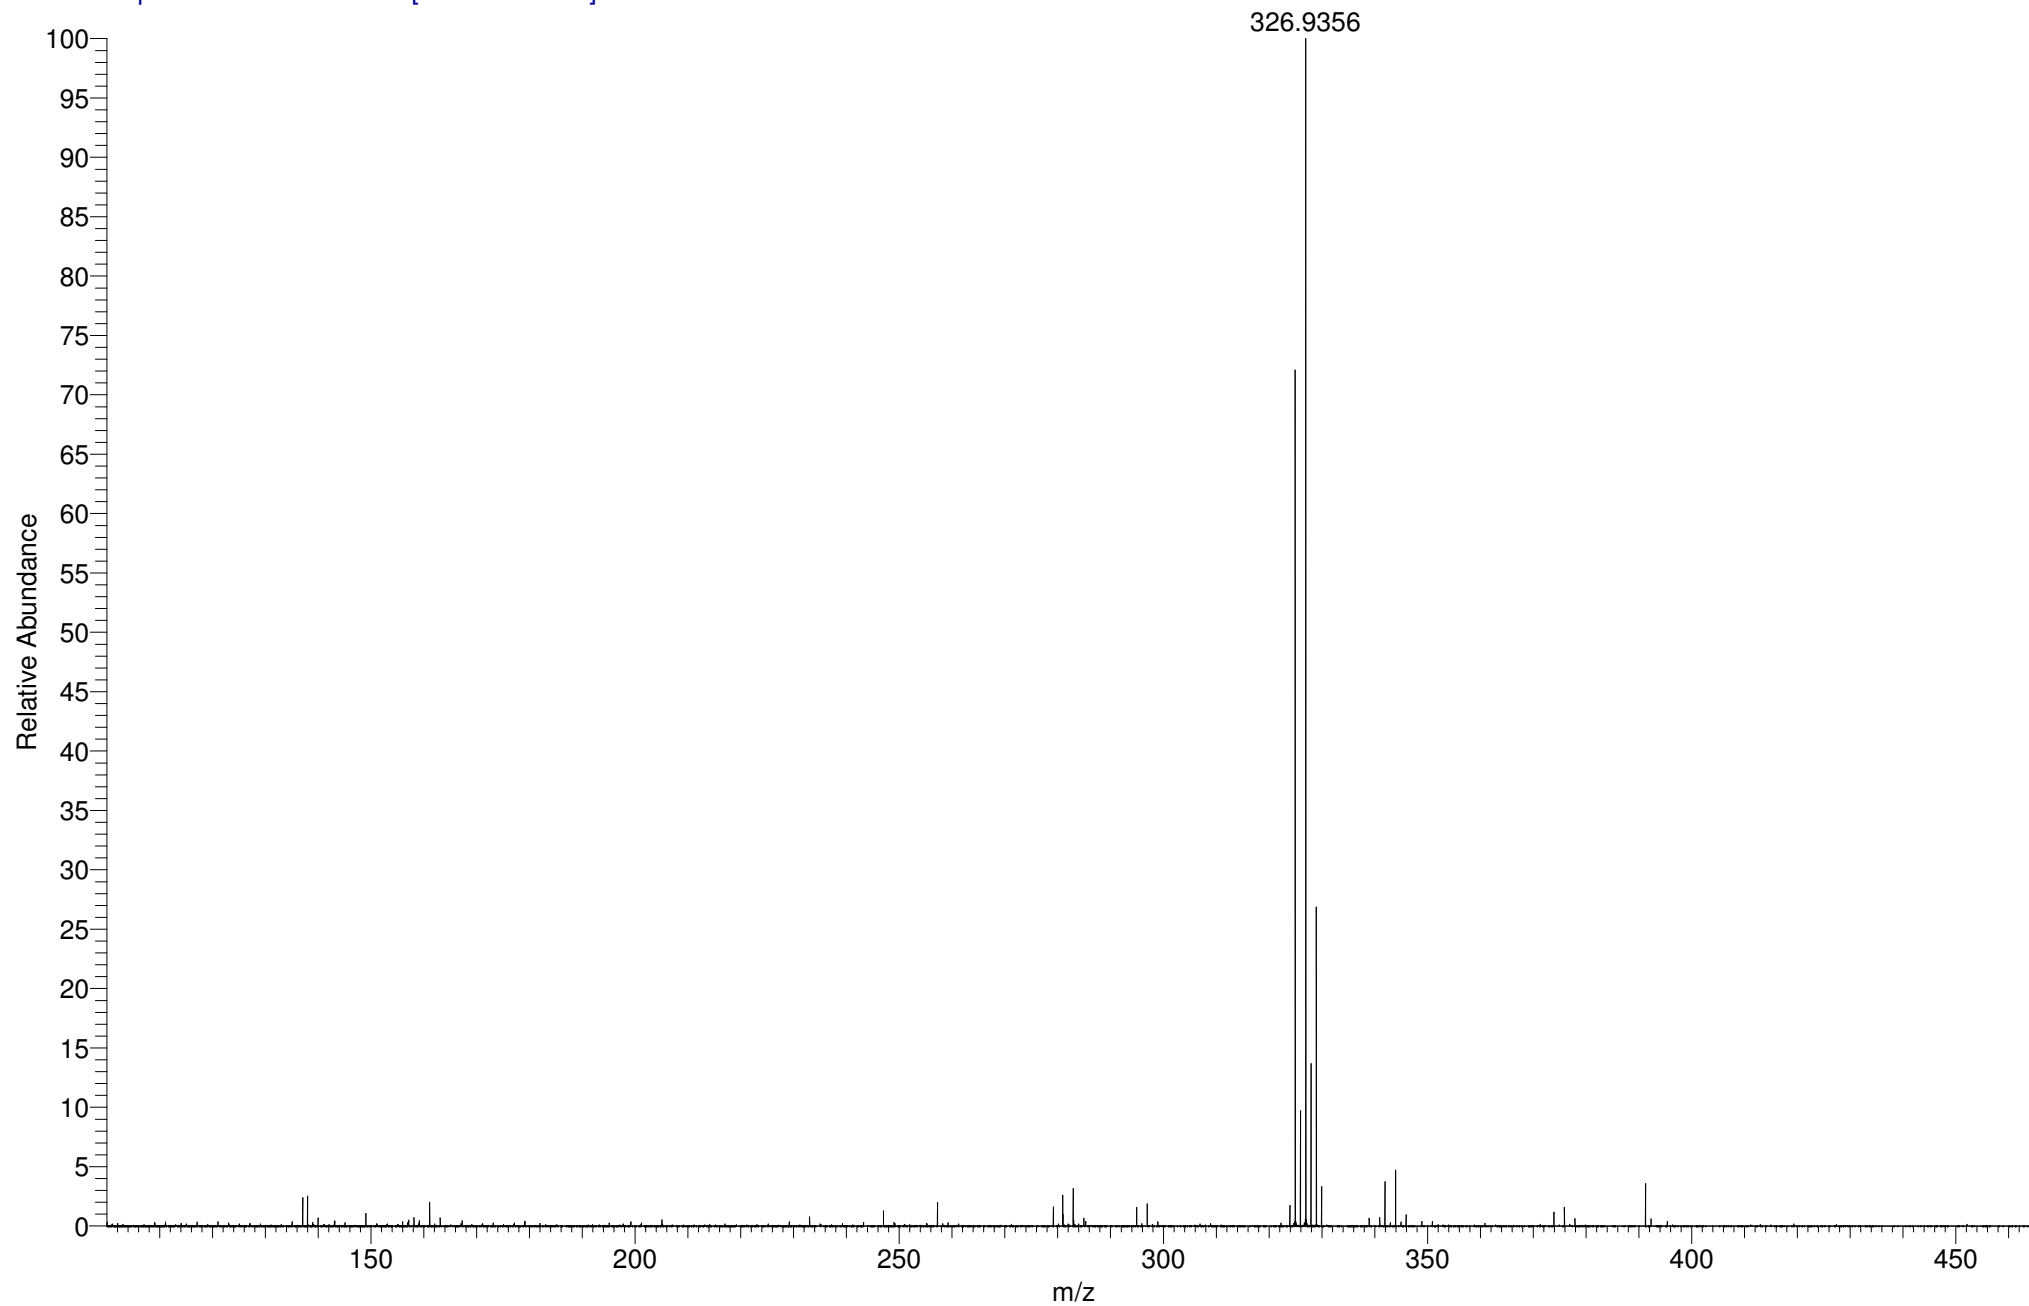

NORPER016-PG-HASP #31-39 RT: 1.77-2.22 AV: 9 SM: 7G NL: 1.23E7

T: FTMS + p APCI corona Full ms [100.00-800.00]

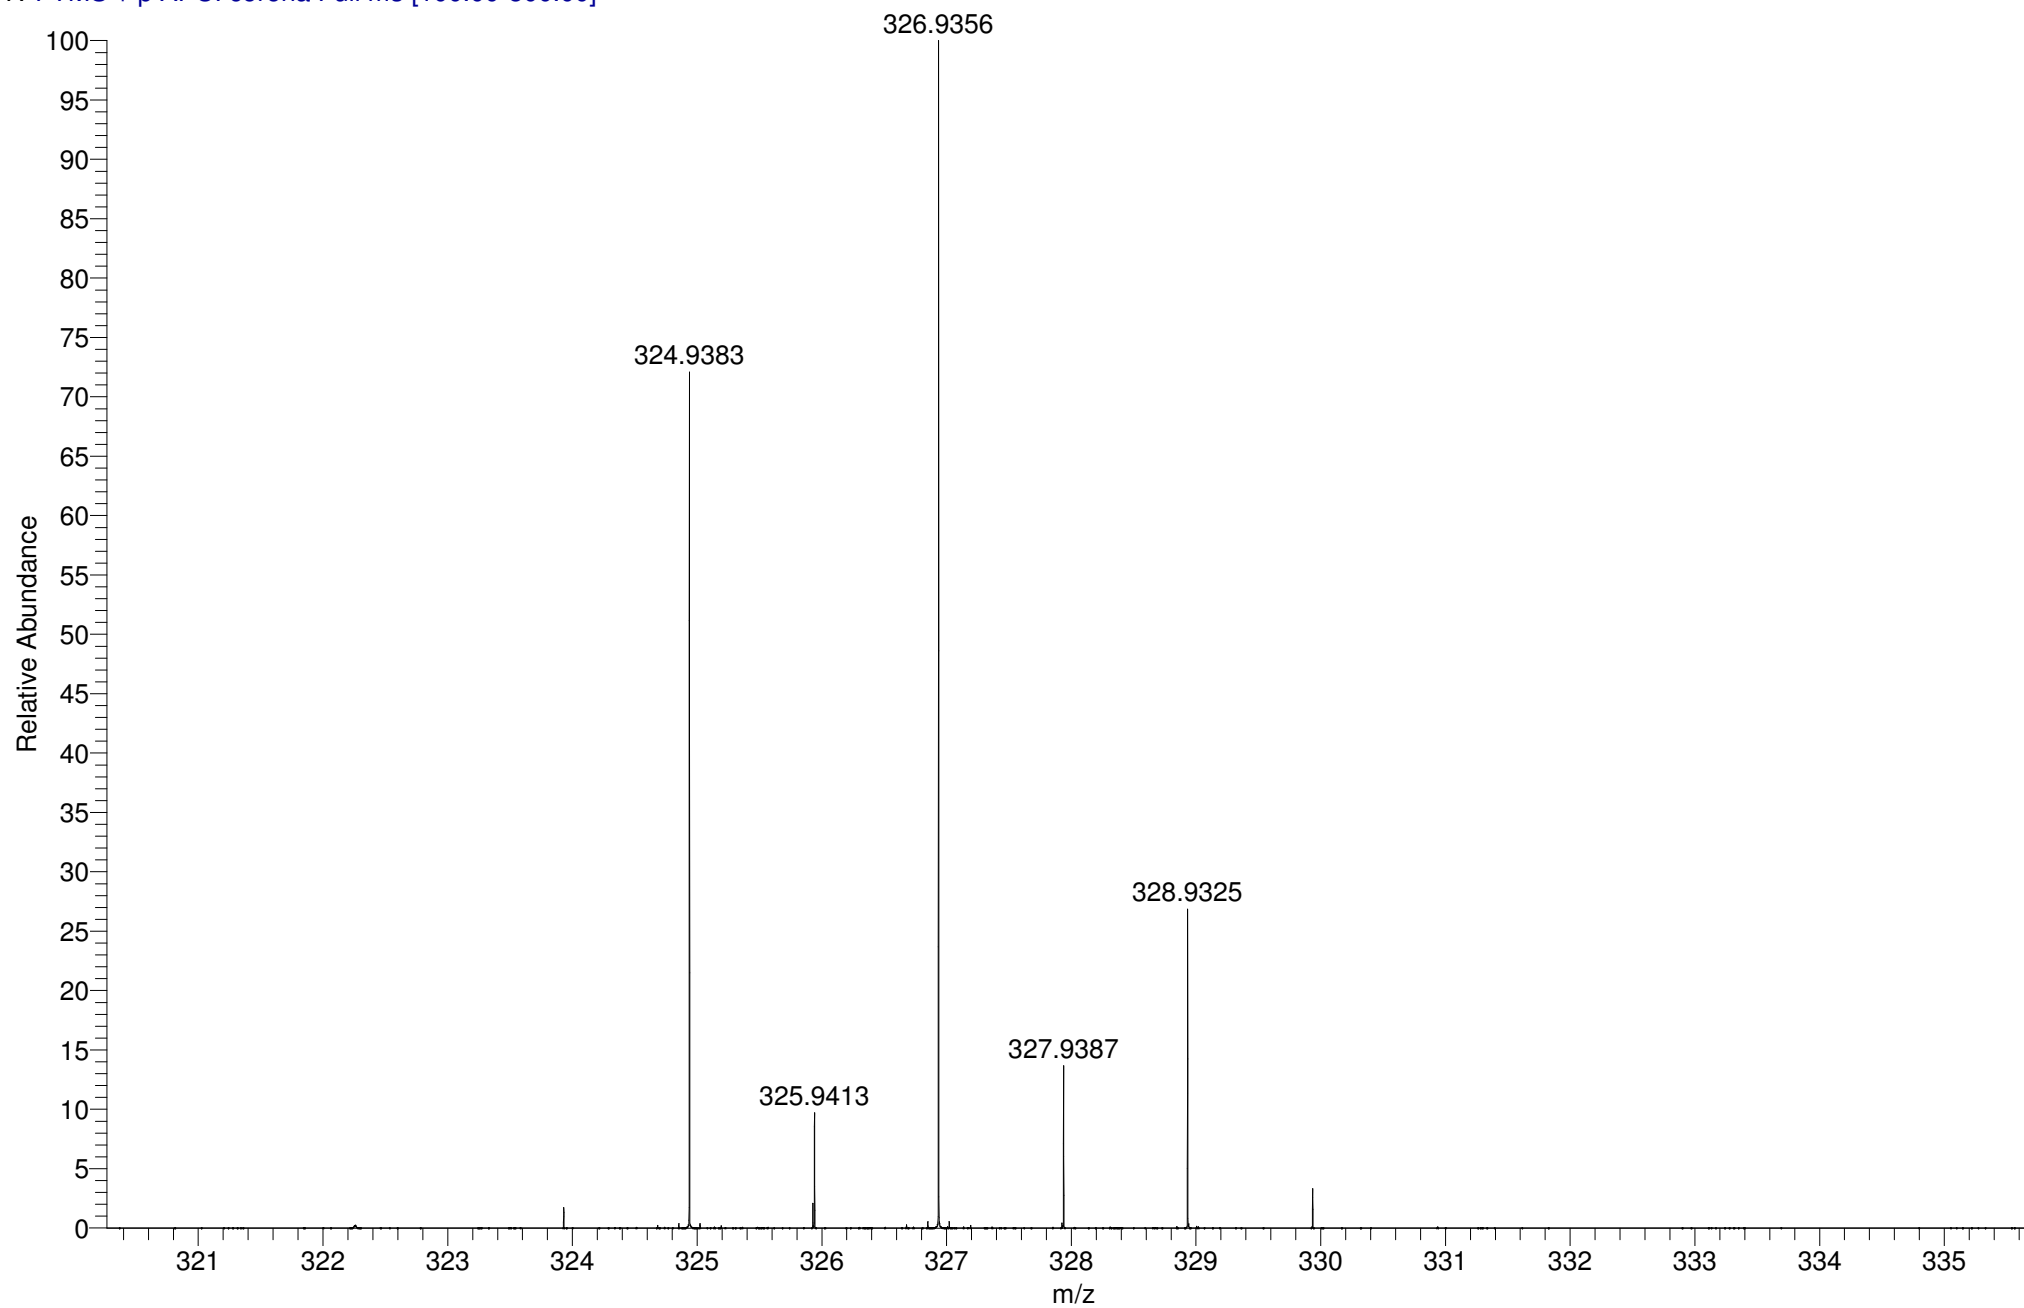

SM: 7G

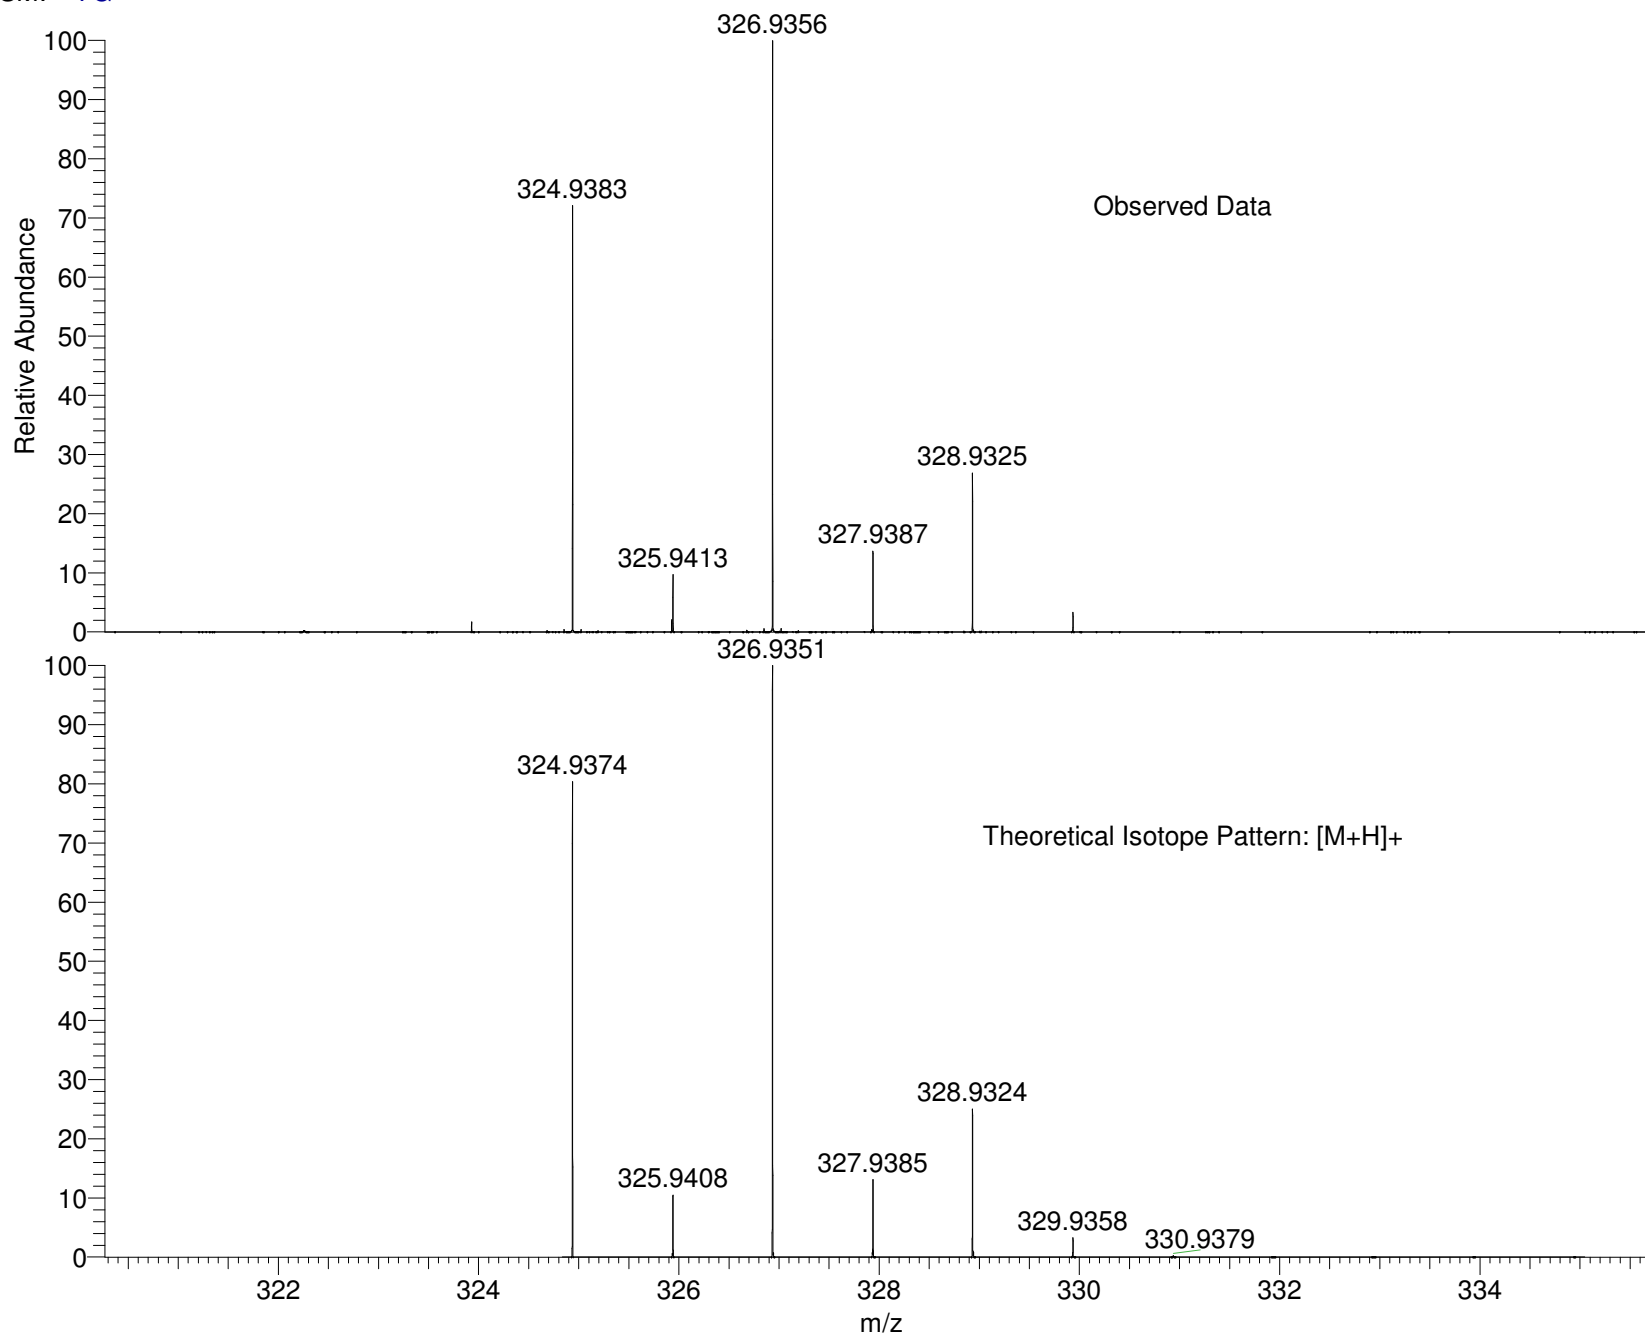

NL:  
1.23E7  
NORPER016-PG-HASP#31-39  
RT: 1.77-2.22 AV: 9 T: FTMS  
+ p APCI corona Full ms  
[100.00-800.00]

NL:  
9.73E3  
C<sub>12</sub>H<sub>6</sub>BrClN<sub>2</sub>O<sub>2</sub>H:  
C<sub>12</sub>H<sub>7</sub>Br<sub>1</sub>Cl<sub>1</sub>N<sub>2</sub>O<sub>2</sub>  
p (gss, s/p:40) Chrg 1  
R: 100000 Res .Pwr . @FWHM

Isotope:                   Min. .. Max.  
 14 N                       0....10  
 16 O                       0....14  
 12 C                       0....65  
 1 H                        0....80  
 23 Na                      0....0  
 35 Cl                      1....2  
 79 Br                      1....2  
 Tolerance Window:       +- 5.00 ppm  
 Db/Ring Equiv:           -3.. 100  
 Fits:                      150

N-Rule:   Do not use  
 Charge:   1

| Mass     | Theoretical<br>Mass | Delta<br>[ppm] | RDB | Composition                                                                                  |
|----------|---------------------|----------------|-----|----------------------------------------------------------------------------------------------|
| 324.9383 | 324.9379            | 1.3            | 5.0 | C <sub>9</sub> H <sub>10</sub> O <sub>1</sub> N <sub>3</sub> Br <sub>1</sub> Cl <sub>2</sub> |
|          | 324.9374            | 2.8            | 9.5 | C <sub>12</sub> H <sub>7</sub> O <sub>2</sub> N <sub>2</sub> Br <sub>1</sub> Cl <sub>1</sub> |
|          | 324.9392            | -2.8           | 4.5 | C <sub>11</sub> H <sub>12</sub> O <sub>2</sub> Br <sub>1</sub> Cl <sub>2</sub>               |
